# Supplementary material for: Poly-assisted template-free synthesis of novel double-shelled Co3O4 yolk–shell submicrospheres with excellent electrochemical properties
Source: Royal Society of Chemistry journal article supplement (doi:10.1039/c5ra14209a), 2015-01-01
Supplement: c5ra14209a1.pdf [file c5ra14209a1.pdf]

# Poly-assisted template-free synthesis novel double-shelled $\text{Co}_3\text{O}_4$ yolk-shell microspheres with excellent electrochemical properties

Yujuan Dong, Huiying Wei, Huifang Bi, Wei Liu, Wenjing Zhang, Yanzhao Yang.\*

Key Laboratory for Special Functional Aggregate Materials of Education Ministry, School of Chemistry and Chemical Engineering, Shandong University, Jinan, 250100, P. R. China. Fax: +86-531-88564464; Tel: +86-531-88362988; E-mail: yzhyang@sdu.edu.cn

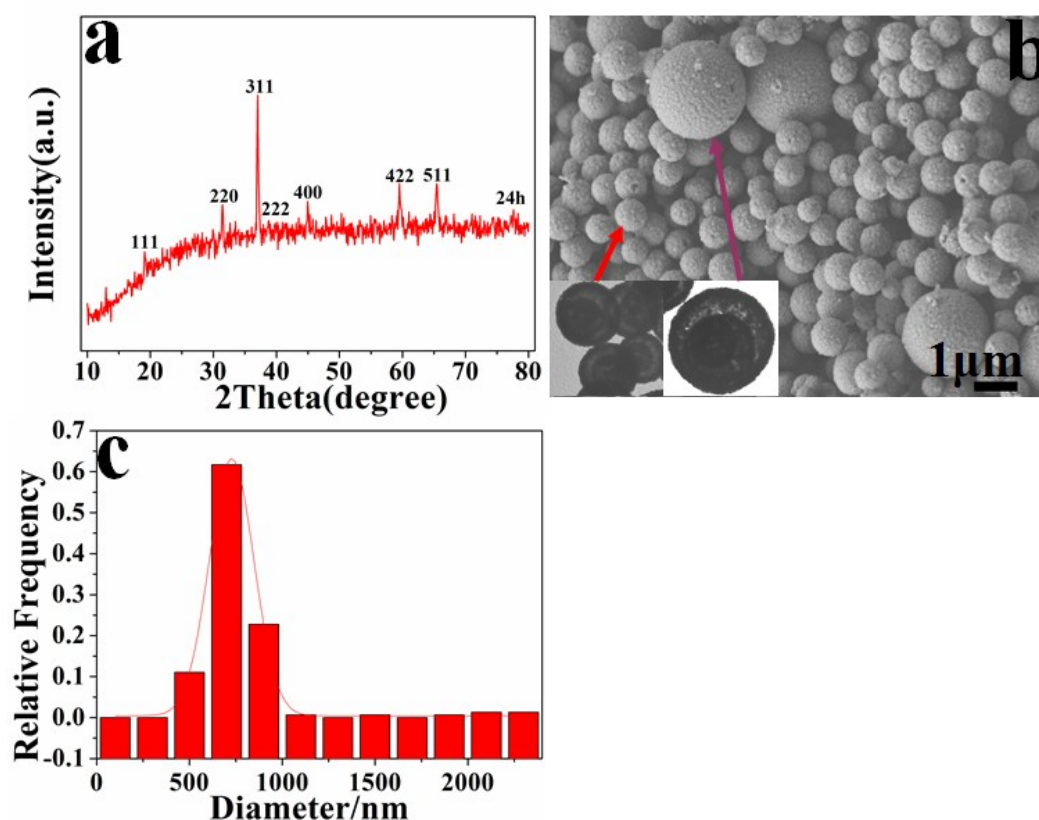

Figure S1 a)XRD pattern; b)SEM image; c)Particle Distribution image of  $\text{Co}_3\text{O}_4$  multishelled spheres obtained by a solvothermal process at 220°C for 24h and subsequent high heating treatment at 600°C for 2h in air.

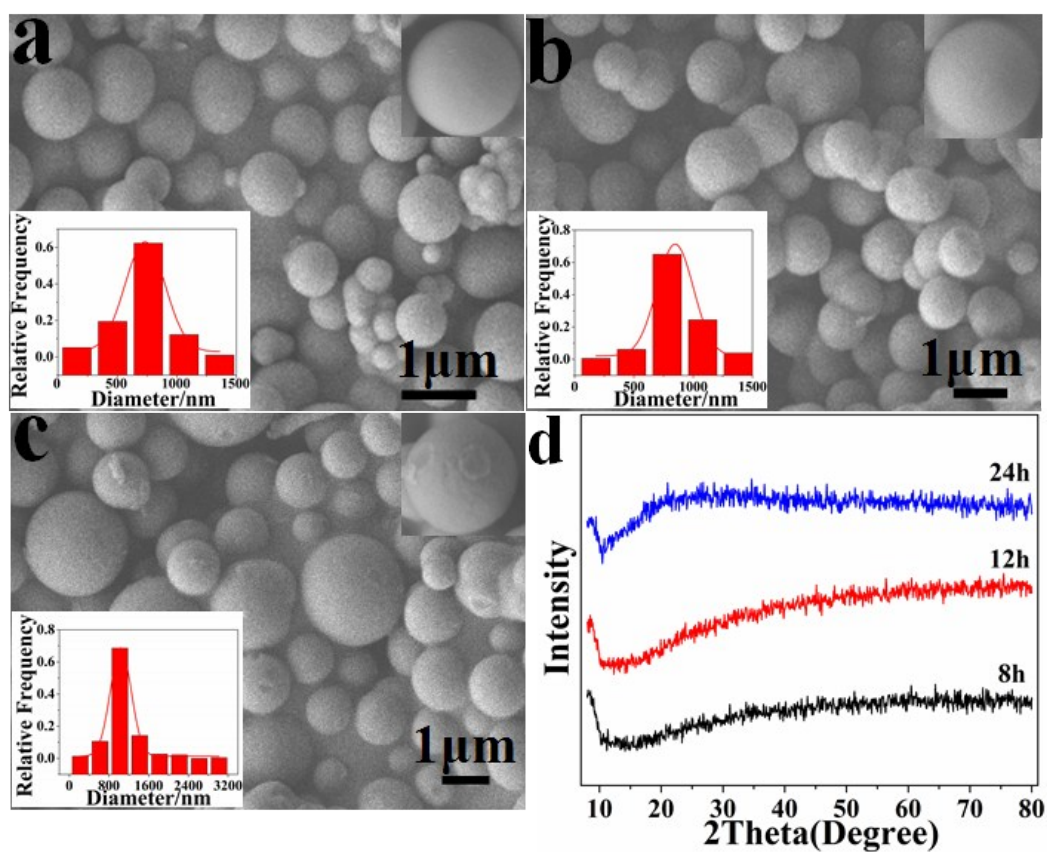

Fig.S2. SEM image of precursor obtained by a solvothermal process at 220°C at different time, a)8h; b)12h; c)24h; d)XRD pattern of the precursors.
